# Supplementary material for: Flow Cytometry as a Rapid and Valuable Method in Investigation of Colistin Resistance in Carbapenem-Resistant Klebsiella pneumoniae Isolates
Source: MDPI journal article supplement (doi:10.3390/antibiotics13050418), 2024-05-02
Supplement: s1 [file s1]

**Supplemental Table S1.** Colistin MIC values of 85 CRKP isolates detected by the BMD and comparison of sensitivity results of FCM and BMD.

| Isolates Number<br>(n=85) | Colistin   |     |     |         |
|---------------------------|------------|-----|-----|---------|
|                           | SMD        |     | FCM | Comment |
|                           | MIC (mg/L) | R/S | R/S |         |
| <i>E. coli</i> NCTC 13846 | 4          | R   | R   | CA      |
| <i>E. coli</i> ATCC 25922 | 0.5        | S   | S   | CA      |
| 027                       | 512        | R   | R   | CA      |
| 762                       | 128        | R   | R   | CA      |
| 292                       | 32         | R   | R   | CA      |
| 763                       | 32         | R   | R   | CA      |
| 926                       | 32         | R   | R   | CA      |
| 284                       | 32         | R   | R   | CA      |
| 559                       | 32         | R   | R   | CA      |
| 545                       | 32         | R   | R   | CA      |
| 241                       | 32         | R   | R   | CA      |
| 570                       | 32         | R   | R   | CA      |
| 989                       | 32         | R   | R   | CA      |
| 710                       | 32         | R   | R   | CA      |
| 502                       | 32         | R   | R   | CA      |
| 936                       | 32         | R   | R   | CA      |
| 088                       | 32         | R   | R   | CA      |
| 278                       | 32         | R   | R   | CA      |
| 688                       | 32         | R   | R   | CA      |
| 725                       | 32         | R   | R   | CA      |
| 766                       | 32         | R   | R   | CA      |
| 785                       | 32         | R   | R   | CA      |
| 511                       | 32         | R   | R   | CA      |
| 826                       | 32         | R   | R   | CA      |
| 741                       | 16         | R   | R   | CA      |
| 163                       | 16         | R   | R   | CA      |
| 291                       | 16         | R   | R   | CA      |
| 054                       | 16         | R   | R   | CA      |
| 322                       | 16         | R   | R   | CA      |
| 7985                      | 16         | R   | R   | CA      |
| 805                       | 16         | R   | R   | CA      |
| 849                       | 16         | R   | R   | CA      |
| 8725                      | 16         | R   | R   | CA      |
| 714                       | 16         | R   | R   | CA      |
| 280                       | 16         | R   | R   | CA      |
| 986                       | 16         | R   | R   | CA      |
| 880                       | 16         | R   | R   | CA      |
| 928                       | 16         | R   | R   | CA      |
| 854                       | 16         | R   | R   | CA      |
| 104                       | 16         | R   | R   | CA      |
| 318                       | 16         | R   | R   | CA      |

|            |          |          |          |           |
|------------|----------|----------|----------|-----------|
| 100        | 16       | R        | R        | CA        |
| 249        | 16       | R        | R        | CA        |
| 071        | 16       | R        | R        | CA        |
| 789        | 16       | R        | R        | CA        |
| 897        | 16       | R        | R        | CA        |
| 159        | 16       | R        | R        | CA        |
| 985        | 16       | R        | R        | CA        |
| 844        | 16       | R        | R        | CA        |
| 867        | 16       | R        | R        | CA        |
| 848        | 16       | R        | R        | CA        |
| 405        | 16       | R        | R        | CA        |
| 585        | 16       | R        | R        | CA        |
| 665        | 8        | R        | R        | CA        |
| 409        | 8        | R        | R        | CA        |
| 852        | 8        | R        | R        | CA        |
| 394        | 8        | R        | R        | CA        |
| 057        | 8        | R        | R        | CA        |
| 403        | 8        | R        | R        | CA        |
| 825        | 8        | R        | R        | CA        |
| 0725       | 8        | R        | R        | CA        |
| 963        | 8        | R        | R        | CA        |
| 940        | 8        | R        | R        | CA        |
| 439        | 8        | R        | R        | CA        |
| 384        | 8        | R        | R        | CA        |
| 429        | 4        | R        | R        | CA        |
| 512        | 4        | R        | R        | CA        |
| 866        | 4        | R        | R        | CA        |
| 550        | 4        | R        | R        | CA        |
| 878        | 4        | R        | R        | CA        |
| <b>249</b> | <b>2</b> | <b>S</b> | <b>R</b> | <b>ME</b> |
| 505        | 2        | S        | S        | CA        |
| 734        | 2        | S        | S        | CA        |
| 493        | 2        | S        | S        | CA        |
| 611        | 2        | S        | S        | CA        |
| 898        | 1        | S        | S        | CA        |
| 777        | 1        | S        | S        | CA        |
| 356        | 0.5      | S        | S        | CA        |
| 959        | 0.5      | S        | S        | CA        |
| 765        | 0.5      | S        | S        | CA        |
| 022        | 0.25     | S        | S        | CA        |
| 221        | 0.25     | S        | S        | CA        |
| 078        | 0.125    | S        | S        | CA        |
| 745        | 0.125    | S        | S        | CA        |
| 153        | 0.0625   | S        | S        | CA        |
| 841        | 0.0625   | S        | S        | CA        |
| 289        | 0.03125  | S        | S        | CA        |

S, susceptible; R, resistant; CA, categorical agreement, ME, major error
